# Supplementary material for: (K,Na)NbO3ferroelectrics: a new class of solid-state photochromic materials with reversible luminescence switching behavior
Source: Royal Society of Chemistry journal article supplement (doi:10.1039/c7tc03076b), 2017-01-01
Supplement: c7tc03076b1.pdf [file c7tc03076b1.pdf]

## Supporting Information

### **(K,Na)NbO<sub>3</sub> ferroelectrics: A new class of solid-state photochromic materials with reversible luminescence switching behavior**

Haiqin Sun,<sup>a</sup> Jian Liu,<sup>a</sup> Xusheng Wang,<sup>b</sup> Qiwei Zhang,<sup>a\*</sup> Xihong Hao,<sup>a</sup> and Shengli An<sup>a</sup>

<sup>a</sup> Inner Mongolia Key Laboratory of Ferroelectric-related New Energy Materials and Devices, School of Materials and Metallurgy, Inner Mongolia University of Science and Technology, 7# Arding Street, Kun District, Baotou 014010, China

<sup>b</sup> Functional Materials Research Laboratory, School of Materials Science and Engineering, Tongji University, 4800 Caoyang Road, Shanghai 201804, China

\*E-mail: zqw8000@imust.edu.cn

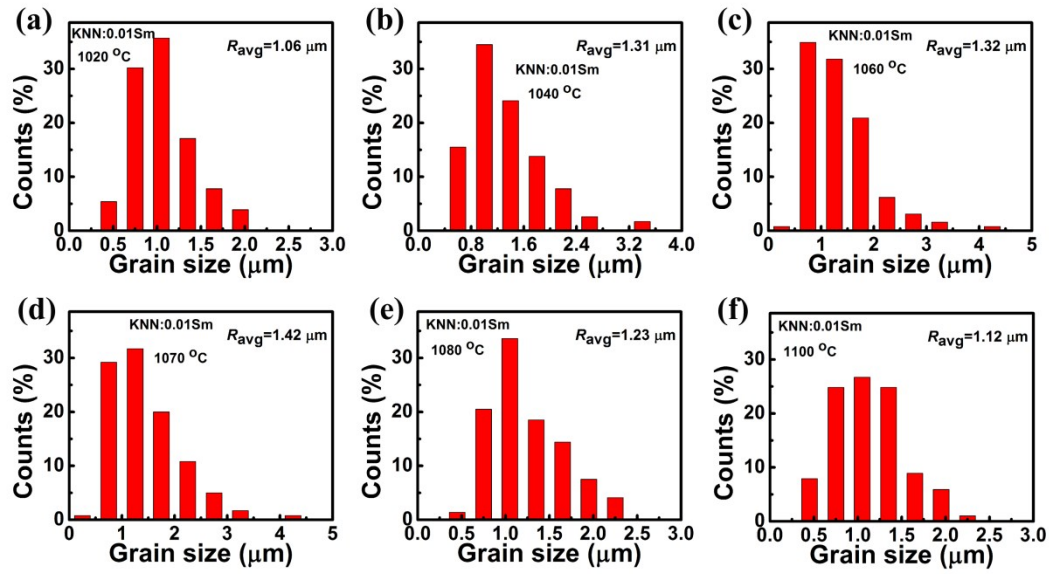

**Fig. S1** Grain size distribution of KNN:0.01Sm samples sintered at different temperatures: (a) 1020 °C, (b) 1040 °C, (c) 1060 °C, (d) 1070 °C, (e) 1080 °C, and (f) 1100 °C.

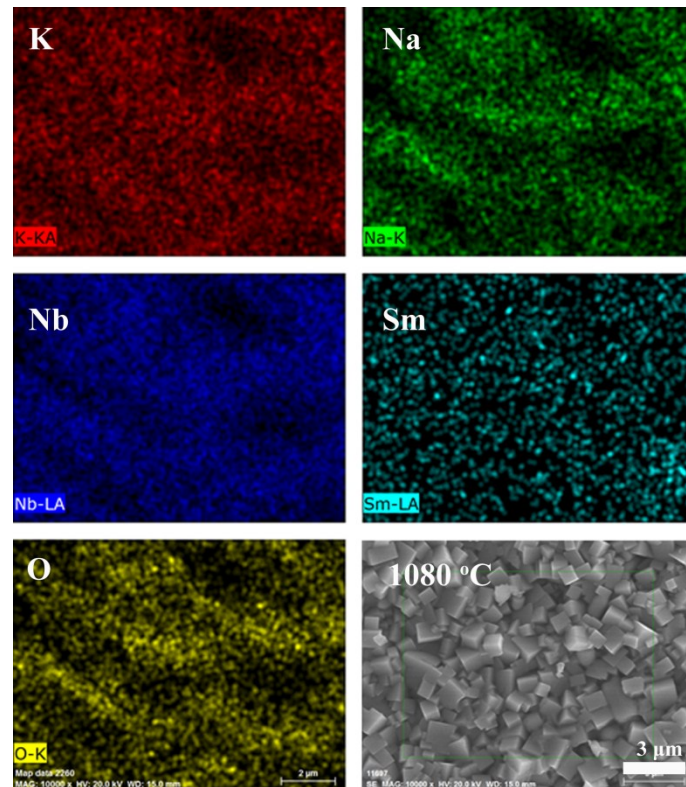

**Fig. S2** Elemental mapping of K, Na, Nb, O, and Sm for KNN:0.01Sm ceramics sintered at 1080 °C

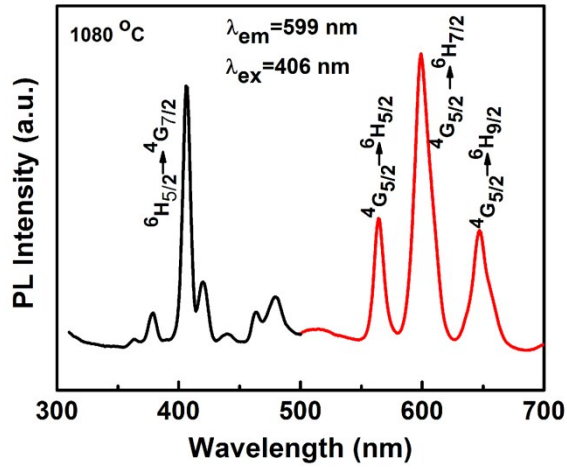

**Fig. S3** Excitation ( $\lambda_{\text{em}}=599$  nm) and emission spectra ( $\lambda_{\text{ex}}=406$  nm) for KNN:0.01Sm ceramics sintered at 1080 °C.

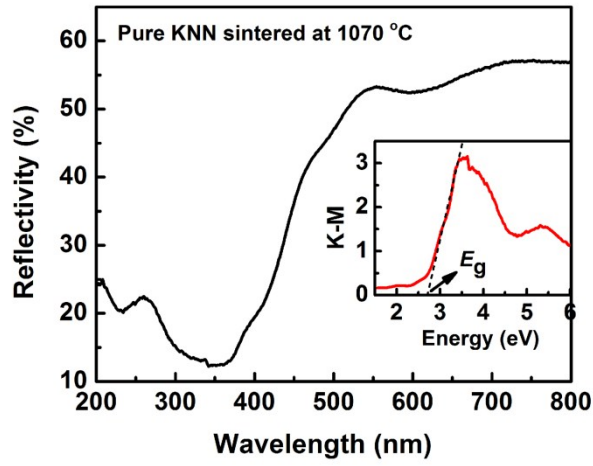

**Fig. S4** Reflective spectrum of pure KNN sintered at 1070 °C for 2 h. The inset is the absorption spectrum converted by a K-M function, the dotted line to the horizontal axis indicates a band gap ( $E_g$ )

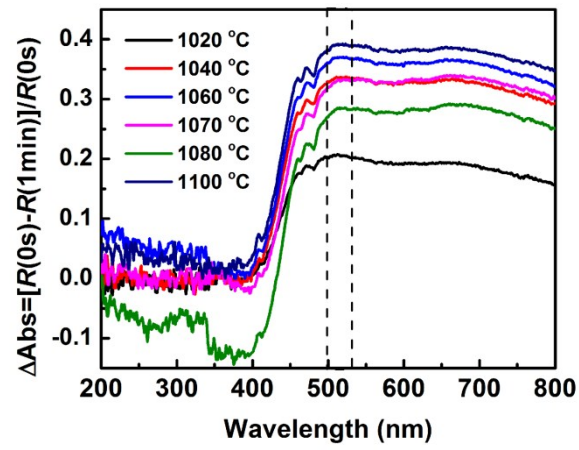

**Fig. S5** The absorption changes ( $\Delta Abs$ ) for KNN:0.01Sm ceramics sintered at various sintering temperatures.
